# Supplementary material for: High frequency, continuous measurements reveal strong diel and seasonal cycling of pCO 2 and CO 2 flux in a mesohaline reach of the Chesapeake Bay
Source: Copernicus journal article supplement (doi:10.5194/egusphere-2023-3056), 2024-01-02
Supplement: Supplementary file 1 [file egusphere-2023-3056-supplement.pdf]

Supplemental

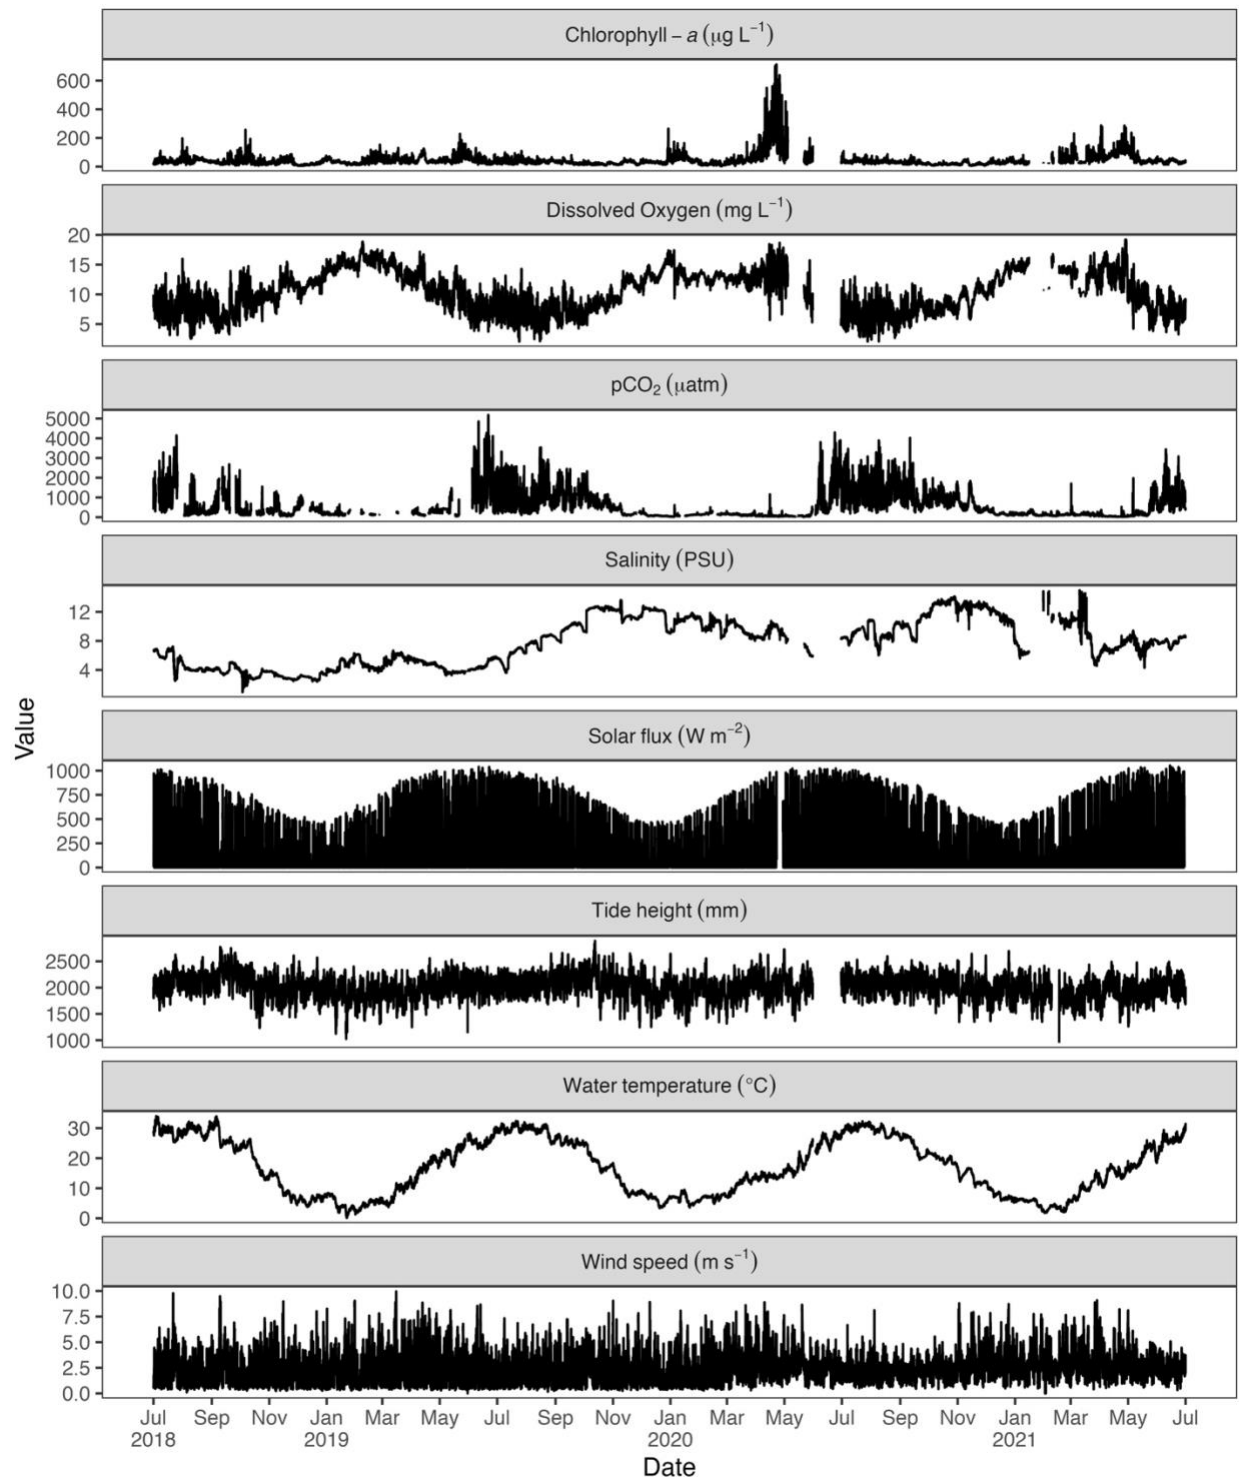

**Fig. S1.** Plot of all raw values from environmental variables for the same time period as CO<sub>2</sub> flux (July 2018–July 2021).

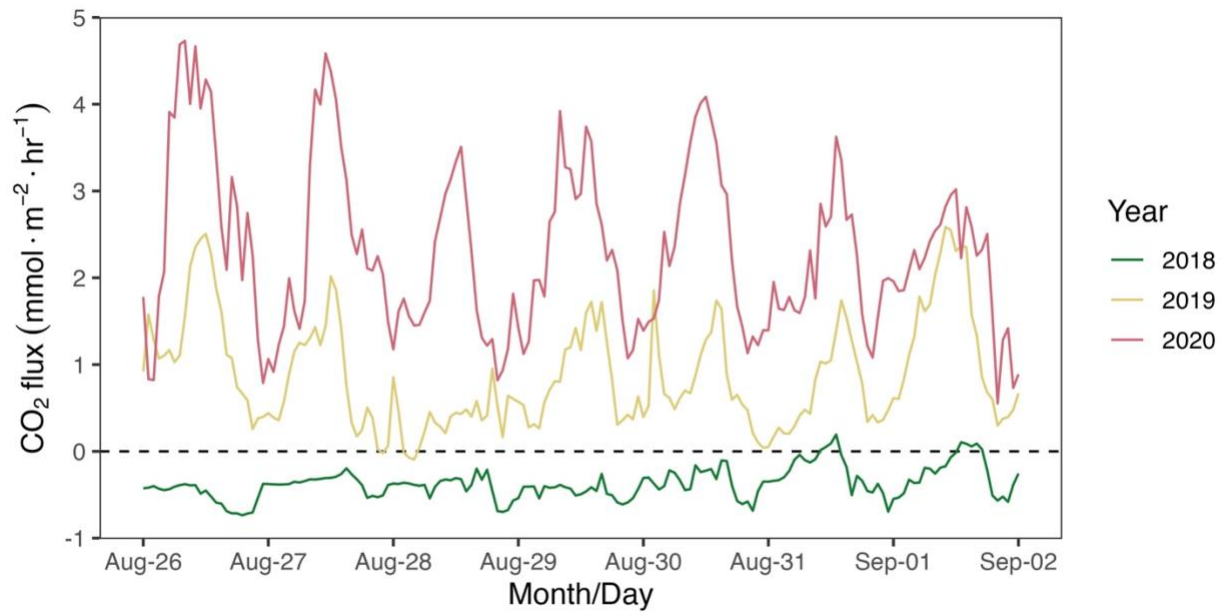

**Fig. S2.** Hourly CO<sub>2</sub> flux estimates for the week of August 26 to Sept 2 where CO<sub>2</sub> flux status differs among years.

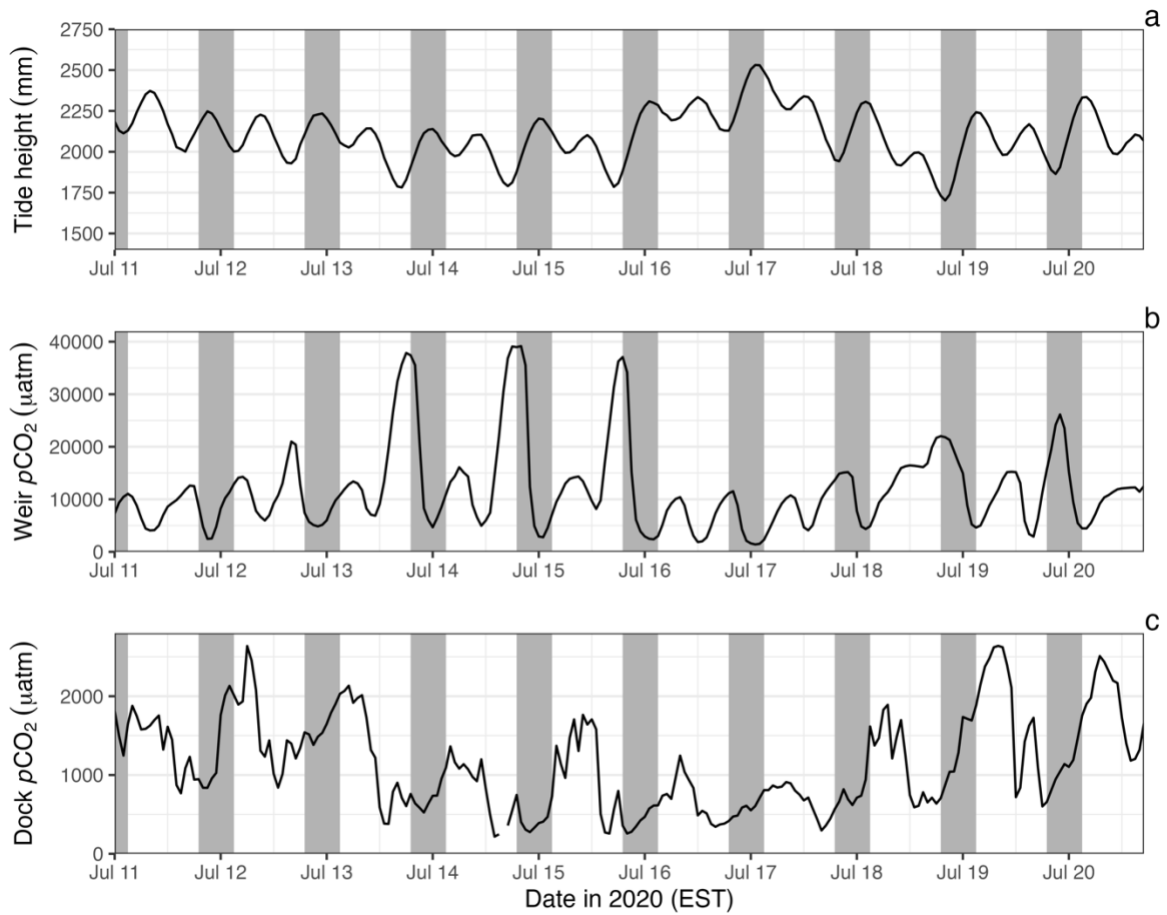

**Fig. S3.** Simultaneous  $p\text{CO}_2$  measurements (1-hour intervals) from SERC dock (panel c) and the mouth of the single tidal creek that drains the Kirkpatrick Marsh (panel b) (11-20 Jul 2020) indicate that dissolved  $\text{CO}_2$  varies at the dock according to a day/night cycle while  $\text{CO}_2$  in the marsh tidal creek rises and falls inversely with tide height (panel a), indicating outwelling of marsh derived  $\text{CO}_2$  (e.g., root respiration, pore and groundwater).
